# Correction: Synergy and allostery in ligand binding by HIV-1 Nef

Abdullah Aldehaiman, Afaque A. Momin, Audrey Restouin, Luyao Wang, Xiaoli Shi, Safia Aljedani, Sandrine Opi, Adrien Lugari, Umar F. Shahul Hameed, Luc Ponchon, Xavier Morelli, Mingdong Huang, Christian Dumas, Yves Collette and Stefan T. Arold

*Biochem J.* 478 (8) 1525–1545 <https://doi.org/10.1042/BCJ20201002>

The authors would like to make the following corrections to their article. In two places the Protein Data Bank IDs were incorrect. At the end of the first paragraph of the ‘Crystallization and structure determination’ section in the ‘Materials and Methods’ the PDB IDs should be 3H0F, 3H0H, and 3H0I. In the ‘Fyn<sub>R96W</sub> mutation alters the SH3 RT loop hydrogen-bond network’ section the PDB IDs should be 3H0F, 3H0H, 3H0I, 6IPY, and 6IPZ. Also, the Fyn<sub>R96W</sub> in the title ‘Fyn<sub>R96W</sub> mutation alters the SH3 RT loop hydrogen-bond network’ should be Fyn<sub>R96W</sub>. The authors apologize for any confusion caused by these errors.

Correction published:  
28 October 2021
